# Supplementary material for: JWA reverses cisplatin resistance via the CK2—XRCC1 pathway in human gastric cancer cells
Source: PubMed Central journal article supplement (PMC4649833; doi:10.1038/cddis.2014.517), 2014-12-04

**a**

GES-1

control  
Si-XRCC1  
Si-XRCC1'

XRCC1

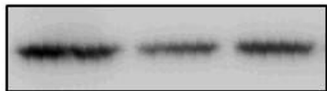 $\beta$ -ACTIN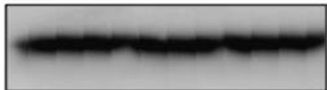**b**Supplementary figure 1  
GES-1control  
Si-JWA  
Si-JWA'

JWA

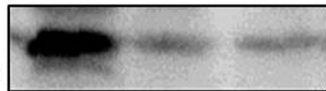 $\beta$ -ACTIN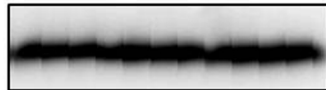

Supplement: cddis2014517x1.pdf [file cddis2014517x1.pdf]
