# Supplementary material for: JWA reverses cisplatin resistance via the CK2—XRCC1 pathway in human gastric cancer cells
Source: PubMed Central journal article supplement (PMC4649833; doi:10.1038/cddis.2014.517), 2014-12-04

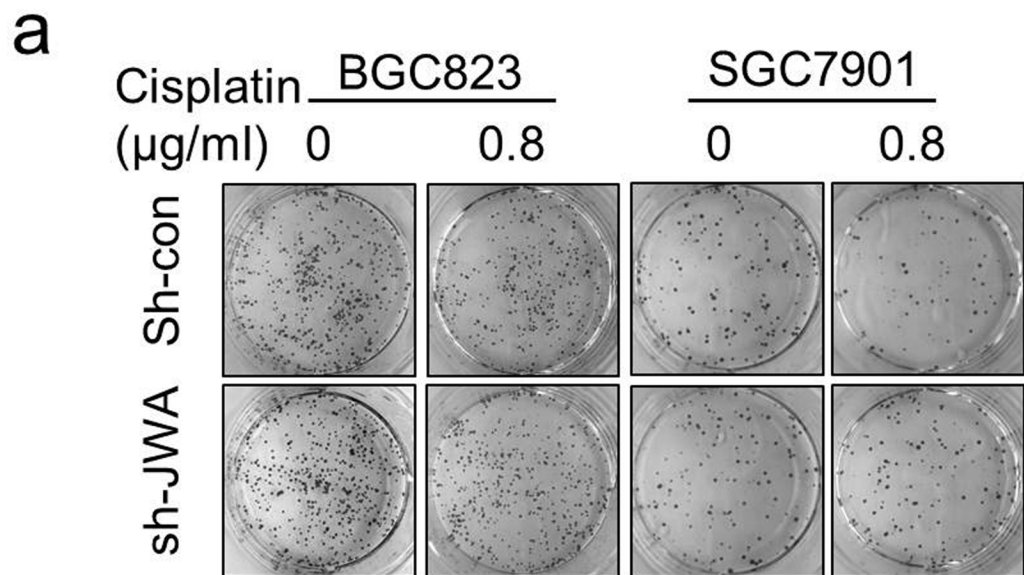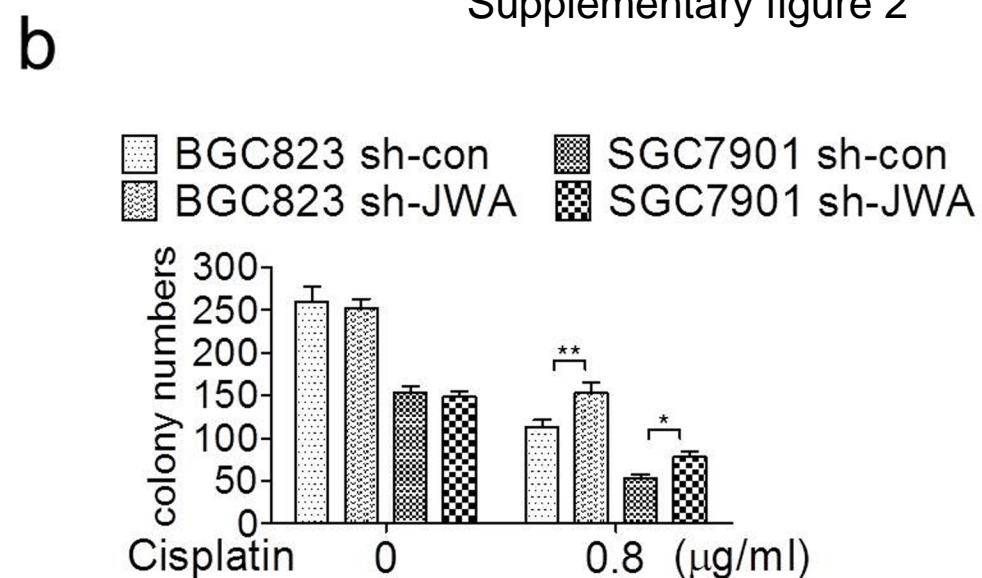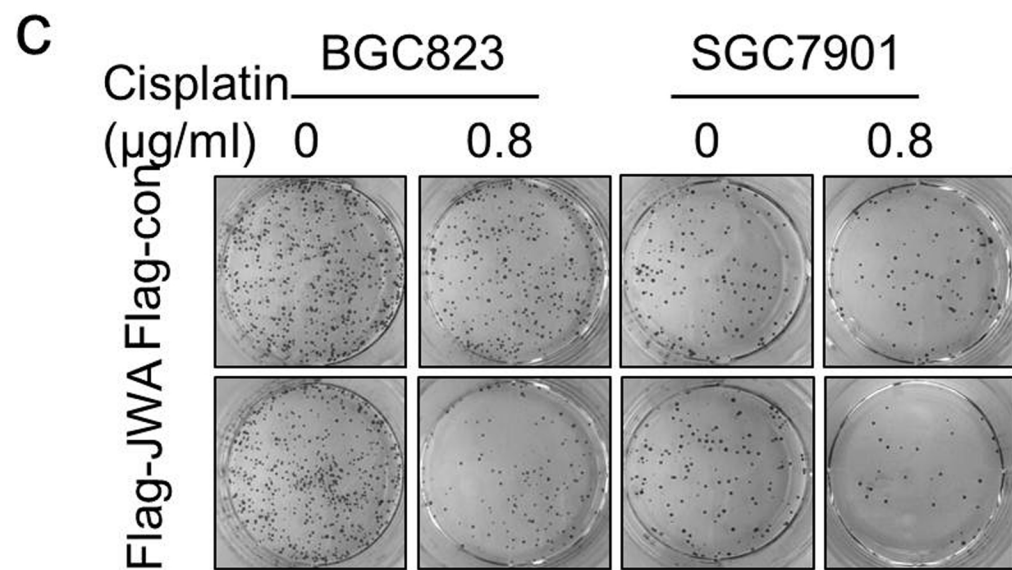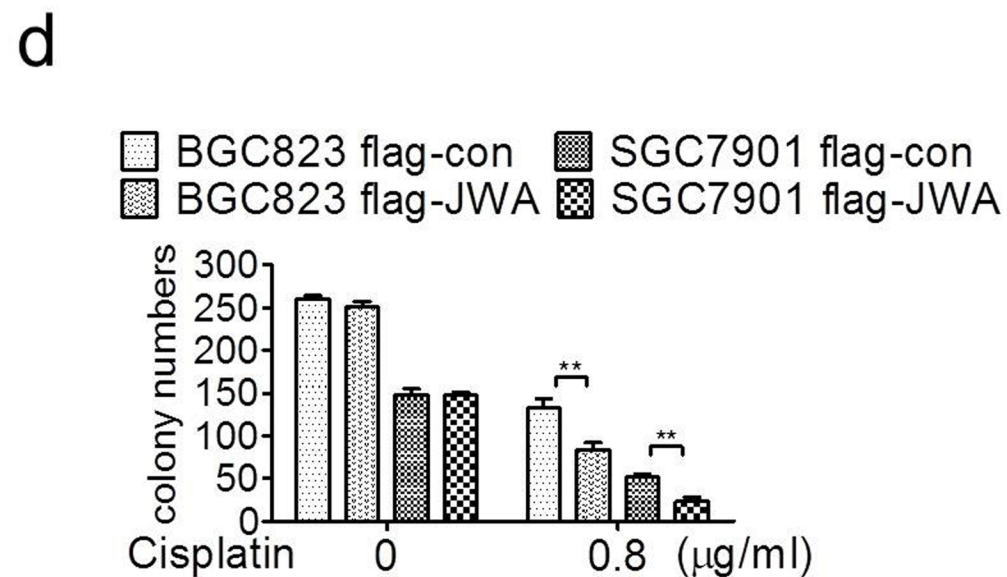

Supplement: cddis2014517x2.pdf [file cddis2014517x2.pdf]
